# Supplementary material for: In Silico Molecular Docking and In Vivo Validation with Caenorhabditis elegans to Discover Molecular Initiating Events in Adverse Outcome Pathway Framework: Case Study on Endocrine-Disrupting Chemicals with Estrogen and Androgen Receptors
Source: PubMed Central journal article supplement (PMC6429066; doi:10.3390/ijms20051209), 2019-03-10
Supplement: ijms-20-01209-s001.pdf [file ijms-20-01209-s001.pdf]

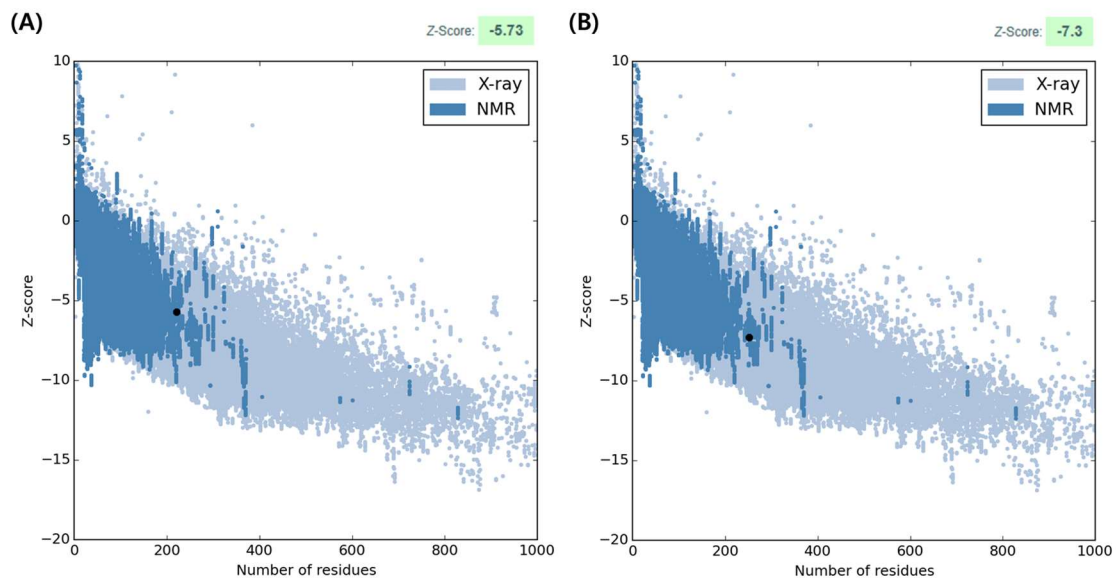

**Figure S1.** Overall model quality of *C. elegans* receptors, (A) NHR-14 and (B) NHR-69 analyzed by ProSA-web. The Z-scores (represented by a black dot) were represented in the range of the Z-score for all proteins in Protein Data Bank of which structures are determined by X-ray crystallography (light blue region) and nuclear magnetic resonance (NMR; dark blue region).

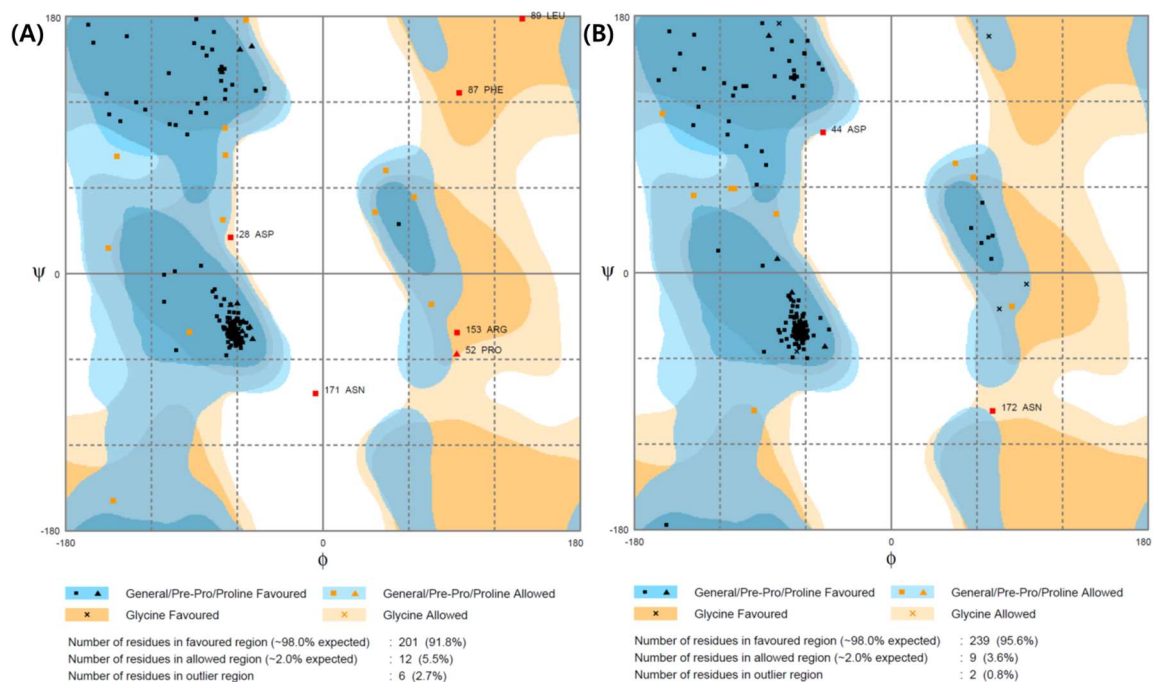

**Figure 2.** A 2D-Ramachandran Plot of *C. elegans* receptors, (A) NHR-14 and (B) NHR-69 analyzed by RAMPAGE server.

| (A)         |            |            |            |            | (B)        |            |             |            |            |
|-------------|------------|------------|------------|------------|------------|------------|-------------|------------|------------|
| 10          | 20         | 30         | 40         | 50         | 10         | 20         | 30          | 40         | 50         |
| MDFLISTSLS  | ESTSTSADFC | VVCGDKAIGK | HYGAVACNGC | KGFFRRSVWQ | MVEEICHICN | DKSTGKHYGA | ISCDGCKGFF  | RRSIRKRYHY | QCRFEQNCDV |
| 60          | 70         | 80         | 90         | 100        | 60         | 70         | 80          | 90         | 100        |
| NLQYTCRFNK  | QCNIDKDRN  | ACRYCRFQKC | LADGMKPEAI | QNERDRIGST | TKNKRNACRA | CRLQKCVKAG | MKSNAIQNER  | DAIGKRKKT  | GAEKEDLIDQ |
| 110         | 120        | 130        | 140        | 150        | 110        | 120        | 130         | 140        | 150        |
| KRRKRSYGANS | ENNSDSEGTP | SPKIEVMGNS | VSRKLIEMLL | DIEHRLASNQ | LVAEETLCQQ | LRSSVIKNTS | SLAPYDCGKV  | KWNYEDARAA | TLDDIGKSIH |
| 160         | 170        | 180        | 190        | 200        | 160        | 170        | 180         | 190        | 200        |
| SMNALLRDES  | EMKNSRQRAV | NYLIGWTNML | HPLPEVPLAD | KVLLKKPSS  | QQLVLFIEWA | KSLPQFSFLA | QADQAALLKG  | GAASIIVLGV | AYRSICLTVE |
| 210         | 220        | 230        | 240        | 250        | 210        | 220        | 230         | 240        | 250        |
| AFTLLGLQR   | SMALPHFVLP | NDQVLSISAS | HPELFEALT  | RIIDELLTFL | NTICLANDTL | LPKEHATQVG | DINCVVGRII  | DEIVNEMRRL | NMDLIEYVAL |
| 260         | 270        | 280        | 290        | 300        | 260        | 270        | 280         | 290        | 300        |
| RRLRTDHAEF  | SCLKALLLN  | PDVVGISNNT | RERIREARDA | LLKTLFAYMS | KAILFFNEVV | REINDQSPVE | NARYAFLRSL  | QRRCTDKALE | NMEDESMDCR |
| 310         | 320        | 330        | 340        | 350        | 310        | 320        | 330         | 340        | 350        |
| NTQNSIDASL  | RVSSLLMIIP | SLISVSSSIM | EFPALSDLFG | LGDVIKRDTI | SGKLLLLLPS | LQAIAQLVE  | DVQLARLFLGL | VNVDSLMEEL | ILNDMKPSPD |
| 360         | 370        | 380        | 390        | 400        | 360        | 370        |             |            |            |
| SPKIEPPLE   | MKPMMPKIAQ | PFVTSAPTVP | TNIMMNKDLI | SQIMNPNQLF | QILQTSLASP | VNSSVKAEEV | LEE         |            |            |
| 410         | 420        | 430        |            |            |            |            |             |            |            |
| PLLEMPQTAS  | PFMSFMQSE  | FGCHLQSMFV | KVILS      |            |            |            |             |            |            |

**Figure S3.** Sequences information of *C. elegans* receptors, (A) NHR-14 and (B) NHR-69 from UniProt Database with accession number O02151 and P91829, respectively. The ligand-binding domain is highlighted in yellow.

**Table 1.** A full list of the ligands.

| No. | Chemical                                       |            |                                                                                |                        |
|-----|------------------------------------------------|------------|--------------------------------------------------------------------------------|------------------------|
|     | Name                                           | CAS No.    | SMILES                                                                         | Category               |
| 1   | 17beta-Estradiol                               | 50-28-2    | <chem>C[C@]12CC[C@H]3[C@@H](CCC4=CC(O)=CC=C34)[C@@H]1CC[C@@H]2O</chem>         | Endogenous hormone     |
| 2   | Testosterone                                   | 58-22-0    | <chem>C[C@]12CC[C@H]3[C@@H](CCC4=CC(=O)CC[C@]34C)[C@@H]1CC[C@@H]2O</chem>      | Endogenous hormone     |
| 3   | 1,2-Benzenedicarboxaldehyde                    | 643-79-8   | <chem>O=CC1=CC=CC=C1C=O</chem>                                                 | Environmental chemical |
| 4   | 1,3-Diiminobenz[f]isoindoline                  | 65558-69-2 | <chem>N=C1NC(=N)C2=C1C=C1C=CC=CC1=C2</chem>                                    | Environmental chemical |
| 5   | 1,6-Hexanediol diacrylate                      | 13048-33-4 | <chem>C=CC(=O)OCCCCCOC(=O)C=C</chem>                                           | Environmental chemical |
| 6   | 10-Chloro-9-anthraldehyde                      | 10527-16-9 | <chem>ClC1=C2C=CC=CC2=C(C=O)C2=CC=CC=C12</chem>                                | Environmental chemical |
| 7   | 2,2'-Methylenebis(4-methyl-6-tert-butylphenol) | 119-47-1   | <chem>CC1=CC(CC2=CC(C)=CC(=C2O)C(C)(C)C)=C(O)C(=C1)C(C)(C)C</chem>             | Environmental chemical |
| 8   | 2,4-Bis(1-methyl-1-phenylethyl)phenol          | 2772-45-4  | <chem>CC(C)(C1=CC=CC=C1)C1=CC(=C(O)C=C1)C(C)(C)C1=CC=CC=C1</chem>              | Environmental chemical |
| 9   | 2-Aminoanthracene                              | 613-13-8   | <chem>NC1=CC=C2C=C3C=CC=CC3=CC2=C1</chem>                                      | Environmental chemical |
| 10  | 4,4'-Thiobis(6-tert-butyl-m-cresol)            | 96-69-5    | <chem>CC1=CC(O)=C(C=C1SC1=C(C)C=C(O)C(=C1)C(C)(C)C)C(C)(C)C</chem>             | Environmental chemical |
| 11  | 4,6-Di-tert-butyl-m-cresol                     | 497-39-2   | <chem>CC1=C(C=C(C(O)=C1)C(C)(C)C)C(C)(C)C</chem>                               | Environmental chemical |
| 12  | 4-Cumylphenol                                  | 599-64-4   | <chem>CC(C)(C1=CC=CC=C1)C1=CC=C(O)C=C1</chem>                                  | Environmental chemical |
| 13  | 4-Nitrosodiphenylamine                         | 156-10-5   | <chem>O=NC1=CC=C(NC2=CC=CC=C2)C=C1</chem>                                      | Environmental chemical |
| 14  | 4-Nonylphenol                                  | 104-40-5   | <chem>CCCCCCCCCC1=CC=C(O)C=C1</chem>                                           | Environmental chemical |
| 15  | 7-(Dimethylamino)-4-methylcoumarin             | 87-01-4    | <chem>CN(C)C1=CC2=C(C=C1)C(C)=CC(=O)O2</chem>                                  | Environmental chemical |
| 16  | 7-Diethylamino-4-methylcoumarin                | 91-44-1    | <chem>CCN(CC)C1=CC=C2C(C)=CC(=O)OC2=C1</chem>                                  | Environmental chemical |
| 17  | 7-Methylbenzo[a]pyrene                         | 63041-77-0 | <chem>CC1=C2C=C3C=CC4=C5C(C=CC(C2=CC=C1)=C35)=CC=C4</chem>                     | Environmental chemical |
| 18  | 9,10-Dihydrobenzo[a]pyren-7(8H)-one            | 3331-46-2  | <chem>O=C1CCCC2=C1C=C1C=CC3=C4C(C=CC2=C14)=CC=C3</chem>                        | Environmental chemical |
| 19  | 9-Bromoanthracene                              | 1564-64-3  | <chem>BrC1=C2C=CC=CC2=CC2=CC=CC=C12</chem>                                     | Environmental chemical |
| 20  | 9-Cyanoanthracene                              | 1210-12-4  | <chem>N#CC1=C2C=CC=CC2=CC2=C1C=CC=C2</chem>                                    | Environmental chemical |
| 21  | alpha-Terthiophene                             | 1081-34-1  | <chem>S1C=CC=C1C1=CC=C(S1)C1=CC=CS1</chem>                                     | Environmental chemical |
| 22  | Benzo[a]pyrene                                 | 50-32-8    | <chem>C1=CC2=CC3=CC=C4C=CC=C5C=CC(=C2=C1)C3=C45</chem>                         | Environmental chemical |
| 23  | Benzo[b]fluoranthene                           | 205-99-2   | <chem>C1=CC2=C(C=C1)C1=CC3=C(C=CC=C3)C3=C1C2=CC=C3</chem>                      | Environmental chemical |
| 24  | Benzo[e]pyrene                                 | 192-97-2   | <chem>C1=CC2=C3C=CC=C4C=CC5=CC=CC(=C2=C1)C5=C34</chem>                         | Environmental chemical |
| 25  | Benzo[k]fluoranthene                           | 207-08-9   | <chem>C1=CC2=CC3=C(C=C2C=C1)C1=C2C3=CC=C2=CC=C1</chem>                         | Environmental chemical |
| 26  | Bis(2-Ethylhexyl)phthalate (DEHP)              | 117-81-7   | <chem>CCCC[C@H](CC)COC(=O)C1CCCC1C(=O)OC[C@H](CC)CCCC</chem>                   | Environmental chemical |
| 27  | Bisphenol A                                    | 80-05-07   | <chem>CC(C)(C1=CC=C(O)C=C1)C1=CC=C(O)C=C1</chem>                               | Environmental chemical |
| 28  | Chlorothalonil                                 | 1897-45-6  | <chem>ClC1=C(Cl)C(C#N)=C(Cl)C(C#N)=C1Cl</chem>                                 | Environmental chemical |
| 29  | Crystal Violet lactone                         | 1552-42-7  | <chem>CN(C)C1=CC=C(C=C1)C1(OC(=O)C2=C1C=C(C=C2)N(C)C)C1=CC=C(C=C1)N(C)C</chem> | Environmental chemical |
| 30  | Dodecyl gallate                                | 1166-52-5  | <chem>CCCCCCCCCCCCOC(=O)C1=CC(O)=C(O)C(O)=C1</chem>                            | Environmental chemical |

|    |                                |            |                                                                                            |                        |
|----|--------------------------------|------------|--------------------------------------------------------------------------------------------|------------------------|
| 31 | Ethylene acrylate              | 2274-11-5  | <chem>C=CC(=O)OCCOC(=O)C=C</chem>                                                          | Environmental chemical |
| 32 | Fluazinam                      | 79622-59-6 | <chem>[O-][N+](=O)C1=CC(=C(Cl)C(=C1)N=C(Cl)C=C(C=N1)C(F)(F)F)[N+](([O-])=O)C(F)(F)F</chem> | Environmental chemical |
| 33 | Octyl gallate                  | 1034-01-1  | <chem>CCCCCCCCOC(=O)C1=CC(O)=C(O)C(O)=C1</chem>                                            | Environmental chemical |
| 34 | Tribromoacetaldehyde           | 115-17-3   | <chem>BrC(Br)(Br)C=O</chem>                                                                | Environmental chemical |
| 35 | Trimethylolpropane triacrylate | 15625-89-5 | <chem>CCC(COC(=O)C=C)(COC(=O)C=C)COC(=O)C=C</chem>                                         | Environmental chemical |
